# Supplementary material for: Physical/Chemical Properties and Resorption Behavior of a Newly Developed Ca/P/S-Based Bone Substitute Material
Source: PubMed Central journal article supplement (PMC7475886; doi:10.3390/ma13163458), 2020-08-05

Supplementary

# Physical/Chemical Properties and Resorption Behavior of a Newly Developed Ca/P/S-Based Bone Substitute Material

Bing-Chen Yang <sup>1</sup>, Jing-Wei Lee <sup>2</sup>, Chien-Ping Ju <sup>1,\*</sup> and Jiin-Huey Chern Lin <sup>1,\*</sup>

<sup>1</sup> Department of Materials Science and Engineering, College of Engineering, National Cheng Kung University, Tainan 70101, Taiwan; N58011308@ncku.edu.tw

<sup>2</sup> Division of Plastic and Reconstructive Surgery, National Cheng Kung University Hospital, Department of Surgery, College of Medicine, National Cheng Kung University, Tainan 007A 70403, Taiwan; jwlee@mail.ncku.edu.tw

\* Correspondence: cpju@mail.ncku.edu.tw (C.-P.J.); chernlin@mail.ncku.edu.tw (J.-H.C.L.); Tel.: +886-6-2748086 (C.-P.J.); +886-6-2080391 (J.-H.C.L.)

Received: 3 July 2020; Accepted: 2 August 2020; Published: date

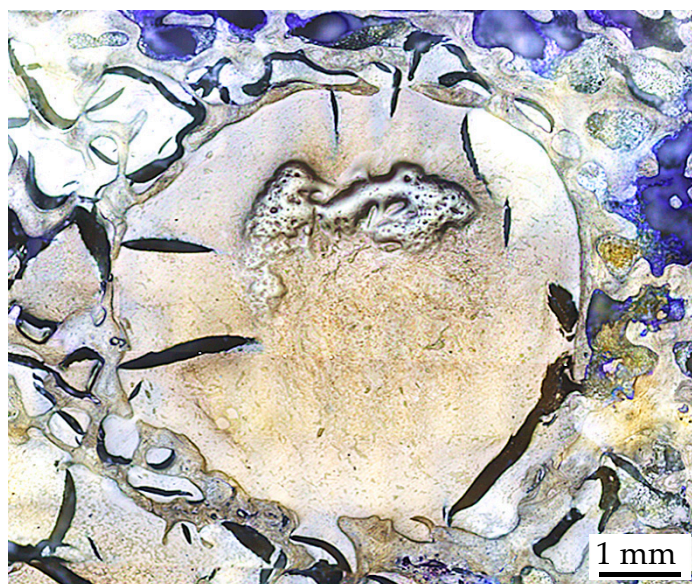

**Figure S1.** TB-stained superimposed composite image of NZW rabbit femur condyle in negative control at 12 weeks post-operation.

**Table S1.** Semi-quantitatively-determined phase contents (wt%) of CBS-400.

| Phase<br>Sample# | HA            | CSD          | TTCP         | DCPA         |
|------------------|---------------|--------------|--------------|--------------|
| 1                | 43.43         | 27.22        | 10.57        | 18.78        |
| 2                | 40.49         | 23.62        | 19.16        | 16.73        |
| 3                | 33.15         | 38.44        | 9.46         | 18.95        |
| 4                | 43.20         | 26.81        | 9.75         | 20.24        |
| 5                | 43.01         | 23.46        | 15.32        | 18.21        |
| 6                | 40.82         | 32.18        | 10.72        | 16.28        |
| Average ± SD     | 40.68 ± 3.90. | 28.62 ± 5.76 | 12.50 ± 3.90 | 18.20 ± 1.48 |

**Table S2.** Normalized compositions (at%) of CBS-400 determined by SEM/EDS.

| Sample #   | Site # | Ca    | P     | S    |
|------------|--------|-------|-------|------|
| 1          | 1      | 54.74 | 37.57 | 7.69 |
|            | 2      | 54.18 | 38.26 | 7.56 |
|            | 3      | 54.24 | 38.15 | 7.61 |
|            | 4      | 54.21 | 38.11 | 7.69 |
|            | 5      | 54.36 | 38.09 | 7.55 |
|            | 6      | 53.99 | 38.09 | 7.92 |
| 2          | 1      | 54.45 | 38.10 | 7.45 |
|            | 2      | 54.62 | 38.13 | 7.25 |
|            | 3      | 54.35 | 38.52 | 7.14 |
|            | 4      | 54.27 | 38.15 | 7.58 |
|            | 5      | 54.14 | 38.24 | 7.61 |
|            | 6      | 54.43 | 38.21 | 7.36 |
| 3          | 1      | 54.78 | 39.52 | 5.70 |
|            | 2      | 54.40 | 39.83 | 5.77 |
|            | 3      | 54.39 | 39.88 | 5.73 |
|            | 4      | 54.68 | 39.60 | 5.72 |
|            | 5      | 54.88 | 39.15 | 5.97 |
|            | 6      | 55.14 | 39.41 | 5.45 |
| 4          | 1      | 55.67 | 38.89 | 5.44 |
|            | 2      | 55.61 | 38.33 | 6.06 |
|            | 3      | 55.14 | 39.09 | 5.76 |
|            | 4      | 54.94 | 39.30 | 5.76 |
|            | 5      | 55.11 | 38.79 | 6.10 |
|            | 6      | 55.55 | 38.70 | 5.76 |
| 5          | 1      | 54.97 | 39.97 | 5.06 |
|            | 2      | 54.83 | 40.00 | 5.16 |
|            | 3      | 54.59 | 40.23 | 5.18 |
|            | 4      | 54.53 | 40.41 | 5.06 |
|            | 5      | 54.54 | 40.10 | 5.36 |
|            | 6      | 54.27 | 40.66 | 5.07 |
| 6          | 1      | 54.17 | 40.79 | 5.03 |
|            | 2      | 54.31 | 40.45 | 5.24 |
|            | 3      | 54.57 | 40.08 | 5.35 |
|            | 4      | 54.45 | 40.19 | 5.36 |
|            | 5      | 54.48 | 40.22 | 5.30 |
|            | 6      | 54.05 | 40.26 | 5.69 |
| Average    |        | 54.61 | 39.21 | 6.18 |
| SD         |        | 0.43  | 0.95  | 1.01 |
| Ca/P ratio |        | 1.39  |       |      |

**Table S3.** Minimum Feret diameter ( $\mu\text{m}$ ) of CBS-400 (unit: number of particles).

| Sample #<br>Minimum<br>Feret Diameter ( $\mu\text{m}$ ) | 1    | 2    | 3   | 4    | 5    | 6    | Sum   |
|---------------------------------------------------------|------|------|-----|------|------|------|-------|
| 0–100                                                   | 0    | 0    | 0   | 0    | 0    | 0    | 0     |
| 100–200                                                 | 11   | 44   | 5   | 27   | 37   | 77   | 201   |
| 200–300                                                 | 9    | 24   | 13  | 15   | 24   | 40   | 125   |
| 300–400                                                 | 59   | 70   | 6   | 20   | 29   | 47   | 231   |
| 400–500                                                 | 269  | 415  | 22  | 112  | 113  | 141  | 1072  |
| 500–600                                                 | 384  | 650  | 40  | 209  | 383  | 364  | 2030  |
| 600–700                                                 | 287  | 443  | 61  | 249  | 461  | 376  | 1877  |
| 700–800                                                 | 242  | 270  | 74  | 234  | 354  | 235  | 1409  |
| 800–900                                                 | 196  | 174  | 108 | 197  | 272  | 175  | 1122  |
| 900–1000                                                | 140  | 148  | 110 | 126  | 169  | 148  | 841   |
| 1000–1100                                               | 105  | 101  | 96  | 124  | 123  | 121  | 670   |
| 1100–1200                                               | 97   | 74   | 106 | 111  | 89   | 92   | 569   |
| 1200–1300                                               | 75   | 59   | 88  | 76   | 77   | 90   | 465   |
| 1300–1400                                               | 42   | 44   | 64  | 38   | 52   | 37   | 277   |
| 1400–1500                                               | 18   | 15   | 15  | 12   | 23   | 25   | 108   |
| 1500–1600                                               | 3    | 4    | 3   | 7    | 18   | 5    | 40    |
| 1600–1700                                               | 1    | 1    | 3   | 1    | 5    | 0    | 11    |
| Sum                                                     | 1938 | 2536 | 814 | 1558 | 2229 | 1973 | 11048 |

**Table S4.** Pore size measurement data (number of pores in different size ranges) of CBS-400.

| Pore Size Range ( $\mu\text{m}$ ) | Sample |     |     | Sum  |
|-----------------------------------|--------|-----|-----|------|
|                                   | 1      | 2   | 3   |      |
| 0~20                              | 1      | 0   | 0   | 1    |
| 21~40                             | 0      | 0   | 3   | 3    |
| 41~60                             | 3      | 1   | 30  | 34   |
| 61~80                             | 31     | 39  | 60  | 130  |
| 81~100                            | 121    | 140 | 103 | 364  |
| 101~120                           | 167    | 154 | 133 | 454  |
| 121~140                           | 117    | 102 | 89  | 308  |
| 141~160                           | 39     | 42  | 55  | 136  |
| 161~180                           | 15     | 16  | 20  | 51   |
| 181~200                           | 6      | 6   | 7   | 19   |
| Sum                               | 500    | 500 | 500 | 1500 |
| Average ( $\mu\text{m}$ )         | 114    | 113 | 109 | 112  |
| SD ( $\mu\text{m}$ )              | 25     | 26  | 32  | 28   |

**Table S5.** Porosity values (vol%) of CBS-400 granular samples.

| Sample # | 1     | 2     | 3     | 4     | 5     | 6     | Average | SD   |
|----------|-------|-------|-------|-------|-------|-------|---------|------|
| CBS-400  | 76.88 | 77.03 | 76.57 | 78.85 | 77.78 | 79.91 | 77.84   | 1.30 |

**Table S6.** pH values of the daily-refreshed Hanks' solution wherein CBS-400 were immersed for 1, 2, 3, 4, 5, 6, 7 and 14 days.

| Sample # | 1    | 2    | 3    | 4    | 5    | 6    | Average | SD   |
|----------|------|------|------|------|------|------|---------|------|
| Day 1    | 5.27 | 5.19 | 5.28 | 5.29 | 5.39 | 5.27 | 5.28    | 0.07 |
| Day 2    | 5.77 | 5.70 | 5.71 | 5.71 | 5.85 | 5.97 | 5.78    | 0.11 |
| Day 3    | 5.79 | 5.83 | 5.72 | 5.83 | 5.91 | 5.99 | 5.85    | 0.10 |
| Day 4    | 6.03 | 6.00 | 5.98 | 5.98 | 6.06 | 6.13 | 6.03    | 0.06 |
| Day 5    | 6.23 | 6.21 | 6.27 | 6.14 | 6.29 | 6.37 | 6.25    | 0.08 |
| Day 6    | 6.34 | 6.40 | 6.44 | 6.37 | 6.48 | 6.56 | 6.43    | 0.08 |
| Day 7    | 6.50 | 6.51 | 6.57 | 6.54 | 6.55 | 6.63 | 6.55    | 0.05 |
| Day 14   | 7.06 | 7.09 | 7.11 | 7.03 | 7.05 | 7.13 | 7.08    | 0.04 |

**Table S7.** Concentrations of Ca, P, and S in the TRIS-HCl and buffered citric acid solutions wherein CBS-400 were immersed.

| Sample                   | Ca    | P     | S     |
|--------------------------|-------|-------|-------|
|                          | ppm   | ppm   | ppm   |
| TRIS-HCl                 |       |       |       |
| Background (TRIS-HCl)    | 3.220 | 0.063 | ND    |
| 24 h-1                   | 234.8 | 4.738 | 411.6 |
| 24 h-2                   | 251.3 | 5.062 | 452.9 |
| 24 h-3                   | 252.8 | 4.410 | 460.9 |
| 24 h-4                   | 249.1 | 4.561 | 448.9 |
| 72 h-1                   | 354.3 | 9.377 | 591.2 |
| 72 h-1                   | 361.1 | 9.529 | 603.4 |
| 72 h-2                   | 364.6 | 9.411 | 602.9 |
| 72 h-3                   | 373.5 | 9.597 | 615.6 |
| 120 h-1                  | 407.7 | 14.43 | 658.9 |
| 120 h-2                  | 415.4 | 14.38 | 653.7 |
| 120 h-3                  | 419.9 | 14.66 | 685.8 |
| 120 h-4                  | 423.1 | 14.71 | 682.3 |
| Citric acid              |       |       |       |
| Background (citric acid) | 1.867 | 0.093 | ND    |
| 120 h-1                  | 1156  | 1234  | 489.1 |
| 120 h-2                  | 1170  | 1238  | 489.1 |
| 120 h-3                  | 1265  | 1345  | 520.7 |
| 120 h-4                  | 1249  | 1325  | 532.8 |

**Table S8.** Optical density of the medium, CBS-400, Al<sub>2</sub>O<sub>3</sub> and phenol groups in cytotoxicity test.

| Medium                   | CBS-400 | CBS-400 | CBS-400 | CBS-400 | Al <sub>2</sub> O <sub>3</sub> | 0.3% Phenol | Medium |
|--------------------------|---------|---------|---------|---------|--------------------------------|-------------|--------|
| Optical density (450 nm) |         |         |         |         |                                |             |        |
| 1.094                    | 0.842   | 0.798   | 0.915   | 0.998   | 1.078                          | 0.513       | 1.121  |
| 1.118                    | 0.935   | 0.881   | 1.013   | 0.861   | 1.047                          | 0.486       | 1.132  |
| 1.159                    | 0.879   | 0.938   | 1.085   | 0.849   | 1.133                          | 0.462       | 1.33   |
| 1.138                    | 0.915   | 0.997   | 0.849   | 1.098   | 1.093                          | 0.648       | 1.099  |
| 1.131                    | 1.074   | 1.051   | 0.953   | 0.911   | 1.137                          | 0.558       | 1.262  |
| 1.136                    | 1.027   | 1.043   | 1.007   | 0.973   | 1.085                          | 0.593       | 1.133  |
| Optical density (630 nm) |         |         |         |         |                                |             |        |
| 0.069                    | 0.044   | 0.057   | 0.051   | 0.054   | 0.051                          | 0.052       | 0.052  |
| 0.071                    | 0.061   | 0.066   | 0.064   | 0.065   | 0.056                          | 0.054       | 0.055  |
| 0.058                    | 0.052   | 0.055   | 0.057   | 0.056   | 0.051                          | 0.056       | 0.054  |
| 0.061                    | 0.069   | 0.065   | 0.061   | 0.063   | 0.071                          | 0.054       | 0.053  |
| 0.055                    | 0.055   | 0.055   | 0.055   | 0.055   | 0.065                          | 0.065       | 0.056  |
| 0.051                    | 0.059   | 0.058   | 0.06    | 0.059   | 0.063                          | 0.063       | 0.061  |











**Table S11.** Body weights (g) of the mice applied with CBS-400 extract, vehicle and positive control.

| CBS-400 extract                             |       |       |       |       |       |       |
|---------------------------------------------|-------|-------|-------|-------|-------|-------|
| Animal #                                    | Day 0 | Day 1 | Day 2 | Day 3 | Day 4 | Day 5 |
| 1                                           | 19.3  | 20    | 20.4  | 20.6  | 20.2  | 19.2  |
| 2                                           | 19.8  | 21.2  | 21.5  | 21.3  | 21.6  | 21    |
| 3                                           | 20.8  | 20.9  | 18.8  | 19.3  | 19.3  | 19.2  |
| 4                                           | 20.8  | 21.4  | 19.8  | 19.8  | 19.7  | 19.6  |
| 5                                           | 20.4  | 20.9  | 21    | 20.6  | 20.5  | 20.8  |
| Vehicle                                     |       |       |       |       |       |       |
| 1                                           | 20.5  | 20.2  | 20.3  | 20.8  | 21    | 20.7  |
| 2                                           | 19.9  | 20.2  | 19.9  | 20.6  | 20.2  | 20.2  |
| 3                                           | 22.5  | 22.5  | 20.4  | 22.6  | 22.9  | 22.5  |
| 4                                           | 19.4  | 19.8  | 22.9  | 20    | 20    | 20    |
| 5                                           | 20.4  | 20.5  | 20.7  | 21    | 20.6  | 20.3  |
| 2,4-dinitrochlorobenzene (positive control) |       |       |       |       |       |       |
| 1                                           | 20.6  | 20    | 19.5  | 19.9  | 20.1  | 19.8  |
| 2                                           | 18.6  | 19.9  | 19.7  | 19.1  | 18.7  | 19.8  |
| 3                                           | 21.2  | 22.6  | 21.7  | 21.9  | 20.8  | 20.4  |
| 4                                           | 18.3  | 19.5  | 19.8  | 19.8  | 18.8  | 19.2  |
| 5                                           | 19.3  | 20.7  | 20.5  | 20.2  | 19.3  | 19.6  |

**Table S12.** Weights (mg) of the lymph nodes of the mice applied with CBS-400 extract, vehicle and positive control.

| Animal # | CBS-400 Extract | Vehicle | 2,4-dinitrochlorobenzene (Positive Control) |
|----------|-----------------|---------|---------------------------------------------|
| 1        | 7.4             | 3.8     | 23.5                                        |
| 2        | 3.8             | 5.1     | 21.6                                        |
| 3        | 5.1             | 3.9     | 22.8                                        |
| 4        | 5.5             | 5.7     | 24.6                                        |
| 5        | 3.9             | 5.1     | 17.4                                        |

**Table S13.** Absorbance (O.D. value) of the lymph node suspension of the mice applied with CBS-400 extract, vehicle and positive control at 450 and 630 nm.

| Animal # | Blank | CBS-400 Extract | Vehicle | 2,4-dinitrochlorobenzene (Positive Control) |
|----------|-------|-----------------|---------|---------------------------------------------|
| 450 nm   |       |                 |         |                                             |
| 1        | 0.099 | 0.263           | 0.124   | 0.480                                       |
| 2        | 0.141 | 0.343           | 0.296   | 0.633                                       |
| 3        | 0.109 | 0.294           | 0.235   | 0.553                                       |
| 4        | 0.139 | 0.285           | 0.229   | 0.539                                       |
| 630 nm   |       |                 |         |                                             |
| 1        | 0.05  | 0.058           | 0.048   | 0.048                                       |
| 2        | 0.05  | 0.051           | 0.047   | 0.045                                       |
| 3        | 0.044 | 0.056           | 0.045   | 0.048                                       |
| 4        | 0.046 | 0.053           | 0.046   | 0.043                                       |

**Table S14.** Area ratios of residual CBS-400 implant and new bone at 3D, 4W, 8W and 12W post-operation for implantation group and area ratio of native bone at 12W for blank.

|        | Implantation Group           |       |       |       |       |       |       |       | Blank                      |      |
|--------|------------------------------|-------|-------|-------|-------|-------|-------|-------|----------------------------|------|
|        | 3D                           |       | 4W    |       | 8W    |       | 12W   |       | 12W                        |      |
|        | 4 mm                         | 5 mm  | 4 mm  | 5 mm  | 4 mm  | 5 mm  | 4 mm  | 5 mm  | 4 mm                       | 5 mm |
| Sample | Residual implant ratio (%)   |       |       |       |       |       |       |       |                            |      |
| 1      | 33.1                         | 26.69 | 10.68 | 6.31  | 8.40  | 5.46  | 2.17  | 1.49  |                            |      |
| 2      | 32.5                         | 24.72 | 26.02 | 21.54 | 14.10 | 11.74 | 11.42 | 9.45  |                            |      |
| 3      | 31.25                        | 24.74 | 12.08 | 7.00  | 12.42 | 8.26  | 8.11  | 5.60  |                            |      |
| 4      |                              |       | 14.37 | 10.01 | 5.74  | 3.77  | 3.91  | 2.82  |                            |      |
| 5      |                              |       | 15.30 | 10.72 | 3.35  | 2.53  | 4.26  | 3.11  |                            |      |
| 6      |                              |       | 14.75 | 11.05 | 5.71  | 3.65  | 0.40  | 0.26  |                            |      |
| Sample | New bone formation ratio (%) |       |       |       |       |       |       |       | Native bone area ratio (%) |      |
| 1      | 47.13                        | 47.15 | 47.86 | 44.46 | 17.41 | 14.85 | 22.13 | 23.28 |                            |      |
| 2      | 28.87                        | 33.85 | 35.23 | 37.30 | 43.96 | 41.46 | 35.98 | 36.90 |                            |      |
| 3      | 49.19                        | 50.14 | 43.72 | 47.17 | 41.75 | 39.75 | 11.58 | 15.12 |                            |      |
| 4      | 39.17                        | 41.56 | 39.82 | 39.39 | 31.48 | 32.77 | 22.21 | 21.01 |                            |      |
| 5      | 42.21                        | 38.73 | 25.93 | 28.85 | 23.83 | 25.31 | 30.19 | 27.37 |                            |      |
| 6      | 47.89                        | 48.37 | 31.34 | 39.09 | 23.84 | 25.68 | 17.87 | 21.45 |                            |      |

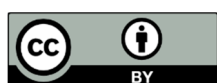

Supplement: materials-13-03458-s001.pdf [file materials-13-03458-s001.pdf]
